# Supplementary material for: Effect of bovine colostrum liposomes on the bioavailability of immunoglobulin G and their immunoregulatory function in immunosuppressed BALB/c mice
Source: Royal Society of Chemistry journal article supplement (doi:10.1039/d3fo05441a), 2024-01-01
Supplement: d3fo05441a1.pdf [file d3fo05441a1.pdf]

## **Supplementary Information**

Figure S1. Effect of bovine colostrum liposome on urine and fecal contents of IgG in BALB/c mice.

Figure S2. Effect of bovine colostrum liposome on serum and jejunum ratio of Th1 to Th2.

**Supplementary Figure. S1**

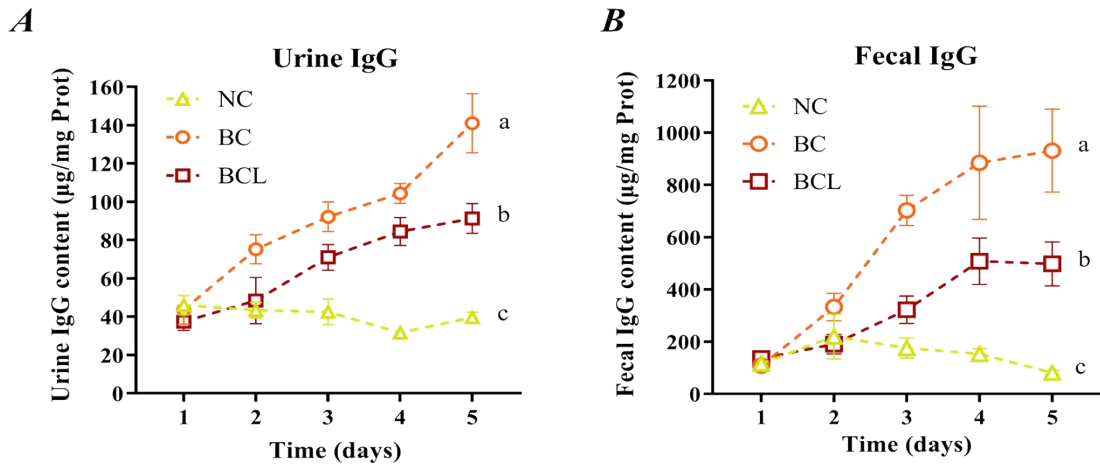

**Supplementary Figure. S1** Effect of bovine colostrum liposome on the urine and fecal contents of IgG in BALB/c mice. All the data were shown as Mean  $\pm$  SEM (n = 6-8 for each groups). Different letters designated significant difference among each groups ( $P < 0.05$ , ANOVA). NC: normal control group. BL: BALB/c mice were gavaged with 370 mg/kg bovine colostrum group. BCL: BALB/c mice were gavaged with 370 mg/kg bovine colostrum liposome group. IgG, immunoglobulin G.

**Supplementary Figure. S2**

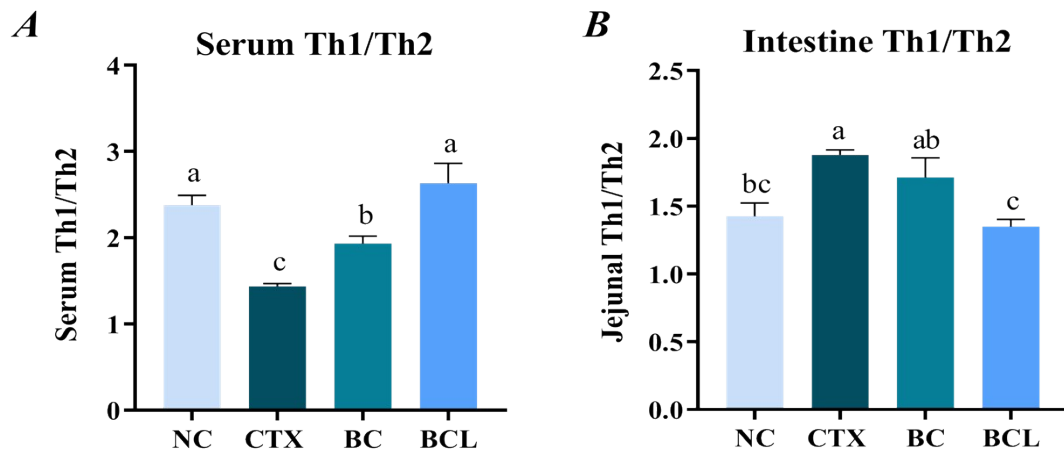

**Supplementary Figure. S2 Effect of bovine colostrum liposome on the serum and jejunum ratio of Th1 to Th2.** All the data were shown as Mean ± SEM (n = 6-8 for each groups). Different letters designated significant difference among each groups ( $P < 0.05$ , ANOVA). NC: normal control group. BL: BALB/c mice were gavaged with 370 mg/kg bovine colostrum group. BCL: BALB/c mice were gavaged with 370 mg/kg bovine colostrum liposome group. Th1, T helper cell 1; Th2, T helper cell 2.
